# Supplementary material for: Postoperative de novo epilepsy after craniotomy: a nationwide register-based cohort study
Source: PubMed Central journal article supplement — J Neurol Neurosurg Psychiatry. 2021 Nov 29;93(4):436–44. doi: 10.1136/jnnp-2021-326968 (PMC8921591; doi:10.1136/jnnp-2021-326968), 2021-11-29

## Supplementary material

### **Additional analyses**

The cumulative risks of post procedure de novo epilepsy were estimated in patients with ruptured or unruptured intracranial aneurysm who underwent endovascular treatment (NCSP: KAAL00) instead of a craniotomy, as endovascular procedure is unlikely to cause epilepsy. This was done for comparison with the risks among patients with similar diagnoses, but treated surgically, to get an impression of the impact of the craniotomy itself on the risk of epilepsy. Results are presented in Table 3.

The cumulative risks of de novo epilepsy were estimated according to the craniotomy being supra- or infratentorial. The following surgical procedure codes were used to define which ones of the craniotomies that were infratentorial: Retro sigmoid approach for intracranial pathology AAE55, Far lateral approach for intracranial pathology AAE70, Far lateral approach for vascular pathology AAE75, and Occipitocervical decompression ABE50. For tumours and haemorrhages of the brainstem or cerebellum, infratentorial surgeries were defined as a combination of craniotomy (AAB00, AAB10, AAB20, AAB30, AAB99) in combination with infratentorial brain cancer diagnosis (C715, C716, C717), or infratentorial intracranial haemorrhage (I613, I614). Cerebral abscesses are usually caused by bacterial spreading through the anterior circulation and are therefore located supratentorial. Traumatic hematomas are usually supratentorial as well and were therefore considered supratentorial. Results are presented in Table 4.

The use of anti-epileptic drugs (ATC code N03A) was used as outcome measure in an additional analysis, instead of the ICD-diagnoses for epilepsy used in the main analyses. In this analysis specific diagnoses were used to exclude or censor due to the fact that anti-epileptic drugs might be used as treatment, thereby altering the risk of seizures. Patients were excluded if diagnosed before craniotomy and censored if diagnosed during follow-up. The diagnoses were ICD-10: DF31 (bipolar affective disorder), DG500 (trigeminal neuralgia), DG56, DG57, DG58, DG59 (neuropathies), DF411 (generalized anxiety disorder) and DG43 (migraine). Results are presented in supplementary table 6.

Furthermore, the cumulative risks of de novo epilepsy after craniotomy were estimated according to patient age at the time of surgery in intervals 0-9, 10-19, 20-44, 45-59, 60-69 and 70+ years of age). Results are presented in supplementary table 7. Finally, the cumulative risks of postoperative de novo epilepsy were estimated among the patients that were excluded due to 1) lack of diagnosis within the time limits, 2)  $\geq 2$  non-tumour indications, and 3)  $\geq 2$  diagnoses within the indication group. Results are presented in supplementary table 8, 9, and 10.

## Supplementary tables

Supplementary table 1. Procedure codes, Nordic Medico-Statistical Committee (NOMESCO) Classification of Surgical Procedures (NCSP), version 1.16.

| <b>Procedure</b>                                                    | <b>NCSP</b> |
|---------------------------------------------------------------------|-------------|
| Extirpation of intracranial lesion                                  | AAB00       |
| Partial excision of intracranial lesion                             | AAB10       |
| Destruction of intracranial lesion                                  | AAB20       |
| Evacuation of spontaneous intracranial haematoma                    | AAB30       |
| Other excision or destruction of intracranial lesion                | AAB99       |
| Ligature of intracranial aneurysm                                   | AAC00       |
| Ligature of feeding artery of intracranial aneurysm                 | AAC05       |
| Intracranial occlusion of vascular fistula                          | AAC30       |
| Extirpation of intracranial arterio-venous malformation             | AAC40       |
| Vascular malformations in the cavernous sinus                       | AAC45       |
| Evacuation of epidural haematoma                                    | AAD00       |
| Evacuation of acute subdural haematoma                              | AAD05       |
| Evacuation of traumatic intracerebral haematoma                     | AAD15       |
| Sub frontal approach for intracranial pathology                     | AAE15       |
| Trans labyrinthine total or partial excision of intracranial lesion | AAE30       |
| Transtemporal total or partial excision of intracranial lesion      | AAE40       |
| Sub temporal approach for intracranial pathology                    | AAE45       |
| Zygomaticotemporal total or partial excision of intracranial lesion | AAE50       |
| Retro sigmoid approach for intracranial pathology                   | AAE55       |
| Occipital approach for intracranial pathology                       | AAE65       |
| Far lateral approach for intracranial pathology                     | AAE70       |
| Far lateral approach for vascular pathology                         | AAE75       |
| Other operation on skull or dura                                    | AAK99       |
| Puncture and evacuation of intracerebral abscess                    | AAM00       |
| Excision of intracerebral abscess                                   | AAM10       |
| Evacuation of epidural or subdural empyema                          | AAM30       |
| Other operation for intracranial infection                          | AAM99       |
| Occipito-cervical decompression                                     | ABE50       |

Supplementary table 2. Tumours, The Danish Cancer Register, International Classification of Diseases for Oncology, third edition (ICD-O-3).

| <b>Tumour type</b>                                                                                                    | <b>ICD-O-3</b> |
|-----------------------------------------------------------------------------------------------------------------------|----------------|
| <b>Meningioma</b>                                                                                                     |                |
| Meningioma, Microcystic meningioma, Secretory meningioma,<br>Lymphoplasmacyte-rich meningioma, Metaplastic meningioma | 9530/0         |
| Meningothelial meningioma                                                                                             | 9531/0         |
| Fibrous meningioma                                                                                                    | 9532/0         |
| Transitoria meningioma                                                                                                | 9537/0         |
| Psammomatous meningioma                                                                                               | 9533/0         |
| Angiomatous meningioma                                                                                                | 9534/0         |
| Chordoid meningioma, Clear cell meningioma                                                                            | 9538/1         |
| Atypical meningioma                                                                                                   | 9539/1         |
| Papillary meningioma, Rhabdoid meningioma                                                                             | 9538/3         |
| Anaplastic meningioma                                                                                                 | 9530/3         |
| <b>Astrocytoma</b>                                                                                                    |                |
| Pilocytic astrocytoma                                                                                                 | 9421/1         |
| Pilomyxoid astrocytoma                                                                                                | 9425/3         |
| Subependymal giant cell astrocytoma                                                                                   | 9384/1         |
| Pleomorphic xanthoastrocytoma                                                                                         | 9424/3         |
| Diffuse astrocytoma                                                                                                   | 9400/3         |
| Fibrillary astrocytoma                                                                                                | 9420/3         |
| Gemistocytic astrocytoma                                                                                              | 9411/3         |
| Protoplasmic astrocytoma                                                                                              | 9410/3         |
| Anaplastic astrocytoma                                                                                                | 9401/3         |
| Gliomatosis cerebri                                                                                                   | 9381/3         |
| Astroblastoma                                                                                                         | 9430/3         |
| Chordoid glioma of the third ventricle                                                                                | 9444/1         |
| Angiocentric glioma                                                                                                   | 9431/1         |
| <b>Glioblastoma</b>                                                                                                   |                |
| Glioblastoma                                                                                                          | 9440/3         |
| Giant cell glioblastoma                                                                                               | 9441/3         |
| Gliosarcoma                                                                                                           | 9442/3         |
| <b>Oligodendroglioma</b>                                                                                              |                |
| Oligodendroglioma                                                                                                     | 9450/3         |

|                                                                                    |        |
|------------------------------------------------------------------------------------|--------|
| Anaplastic oligodendroglioma                                                       | 9451/3 |
| <b>Oligoastrocytoma</b>                                                            |        |
| Oligoastrocytoma, anaplastic oligoastrocytoma                                      | 9382/3 |
| <b>Ependymal</b>                                                                   |        |
| Subependymoma                                                                      | 9383/1 |
| Myxopapillary ependymoma                                                           | 9394/1 |
| Ependymoma, cellular, clear cell, tanycytic                                        | 9391/3 |
| Papillary ependymoma                                                               | 9393/3 |
| Anaplastic ependymoma                                                              | 9392/3 |
| <b>Pineal region</b>                                                               |        |
| Pineocytoma                                                                        | 9361/1 |
| Pineal parenchymal tumour of intermediate differentiation,<br>pineoblastoma        | 9362/3 |
| Papillary tumour of pineal region                                                  | 9395/3 |
| <b>Embryonal</b>                                                                   |        |
| Medulloblastoma                                                                    | 9470/3 |
| Desmoplastic/nodular medulloblastoma, medulloblastoma with<br>extensive nodularity | 9471/3 |
| Anaplastic medulloblastoma, large cell medulloblastoma                             | 9474/3 |
| CNS primitive neuroectodermal tumour                                               | 9473/3 |
| CNS neuroblastoma                                                                  | 9500/3 |
| CNS ganglioneuroblastoma                                                           | 9490/3 |
| Medulloepithelioma                                                                 | 9501/3 |
| Ependymblastoma                                                                    | 9392/3 |
| Atypical teratoid/rhabdoid tumour                                                  | 9508/3 |
| <b>Cranial nerves</b>                                                              |        |
| Schwannoma, cellular, plexiform, melanotic                                         | 9560/0 |
| <b>Mesenchymal</b>                                                                 |        |
| Lipoma                                                                             | 8850/0 |
| Angiolipoma                                                                        | 8861/0 |
| Hibernoma                                                                          | 8880/0 |
| Liposarcoma                                                                        | 8850/3 |
| Solitary fibrous tumour                                                            | 8815/0 |
| Fibrosarcoma                                                                       | 8810/3 |
| Malignant fibrous histiocytoma                                                     | 8830/3 |
| Laiomyoma                                                                          | 8890/0 |

|                                        |        |
|----------------------------------------|--------|
| Laiomyosarcoma                         | 8890/3 |
| Rhabdomyoma                            | 8900/0 |
| Rhabdomyosarcoma                       | 8900/3 |
| Chondroma                              | 9220/0 |
| Chondrosarcoma                         | 9220/3 |
| Osteoma                                | 9180/0 |
| Osteosarcoma                           | 9180/3 |
| Haemangioma                            | 9120/0 |
| Epithelioid haemangioendothelioma      | 9133/1 |
| Haemangiopericytoma                    | 9150/1 |
| Anaplastic haemangiopericytoma         | 9150/3 |
| Angiosarcoma                           | 9120/3 |
| Karposi sarcoma                        | 9140/3 |
| Ewing sarcoma – PNET                   | 9364/3 |
| Hemangioblastoma                       | 9161/1 |
| <hr/>                                  |        |
| <b>Germ cell</b>                       |        |
| Germinoma                              | 9064/3 |
| Embryonal carcinoma                    | 9070/3 |
| Yolk sac tumour                        | 9071/3 |
| Choriocarcinoma                        | 9100/3 |
| Teratoma                               | 9080/1 |
| Mature                                 | 9080/0 |
| Immature                               | 9080/3 |
| Teratoma with malignant transformation | 9084/3 |
| Mixed germ cell tumour                 | 9085/3 |
| <hr/>                                  |        |
| <b>Sellar region</b>                   |        |
| Craniopharyngioma                      | 9350/1 |
| Adamantinomatous                       | 9351/1 |
| Papillary                              | 9352/1 |
| Granular cell tumour                   | 9582/0 |
| Pituicytoma                            | 9432/1 |
| Spindle cell oncocytoma                | 8291/0 |
| <hr/>                                  |        |
| <b>Metastasis</b>                      |        |
| Carcinoma                              | 8010/3 |
| Carcinoma, metastatic, NOS             | 8010/6 |
| Large cell carcinoma                   | 8012/3 |

|                                                                                        |        |
|----------------------------------------------------------------------------------------|--------|
| Small cell carcinoma                                                                   | 8041/3 |
| Non-small cell carcinoma                                                               | 8046/3 |
| Squamous cell carcinoma                                                                | 8070/3 |
| Adenocarcinoma                                                                         | 8140/3 |
| Adenocarcinoma, metastatic                                                             | 8140/6 |
| Renal cell carcinoma, unclassified                                                     | 8312/3 |
| Malignant melanoma                                                                     | 8720/3 |
| <hr/>                                                                                  |        |
| <b>Miscellaneous</b>                                                                   |        |
| Choroid plexus papilloma                                                               | 9390/0 |
| Atypical choroid plexus papilloma                                                      | 9390/1 |
| Choroid plexus carcinoma                                                               | 9390/3 |
| Dysplastic gangliocytoma of cerebrum                                                   | 9493/0 |
| Desmoplastic infantile astrocytoma/ganglioglioma                                       | 9412/1 |
| Dysembryoplastic neuroepithelial tumour                                                | 9413/0 |
| Gangliocytoma                                                                          | 9492/0 |
| Ganglioglioma                                                                          | 9505/1 |
| Anaplastic ganglioglioma                                                               | 9505/3 |
| Central neurocytoma, extra ventricular neurocytoma, cerebellar neurocytoma             | 9506/1 |
| Papillary glioneuronal tumour, rosette-forming glioneuronal tumour of fourth ventricle | 9509/1 |
| Paraganglioma                                                                          | 8680/1 |
| Diffuse melanocytosis                                                                  | 8728/0 |
| Melanocytoma                                                                           | 8728/1 |
| Meningeal melanomatosis                                                                | 8728/3 |

---

Supplementary table 3. Non-tumour pathology: Spontaneous intracranial haemorrhage, traumatic intracranial haemorrhage, abscess and congenital malformations, The National Patient Register,

| Exclusion criteria                                                                                                      | Data source | Codes                   | Number of excluded patients |
|-------------------------------------------------------------------------------------------------------------------------|-------------|-------------------------|-----------------------------|
| International Statistical Classification of Diseases and Related Health Problems, 10 <sup>th</sup> revision (ICD-10).   |             |                         |                             |
| <b>Disease</b>                                                                                                          |             |                         | <b>ICD-10</b>               |
| <b>Spontaneous intracranial haemorrhage and other vascular conditions</b>                                               |             |                         |                             |
| Ruptured aneurysm                                                                                                       |             | DI601, DI602, DI603     |                             |
| Intracerebral haemorrhage and other non-traumatic intracranial haemorrhage                                              |             | DI61, DI62              |                             |
| Cerebral aneurysm, non-ruptured                                                                                         |             | DI671                   |                             |
| Arteriovenous malformation of cerebral vessels or Moya-Moya disease                                                     |             | DQ282, DI675            |                             |
| <b>Traumatic intracranial haemorrhage</b>                                                                               |             |                         |                             |
| Traumatic subdural haemorrhage                                                                                          |             | DS065, DS065A, DS065(B) |                             |
| Epidural haemorrhage                                                                                                    |             | DS064                   |                             |
| Cerebral contusion or other intracranial injuries                                                                       |             | DS068, DS063(C), DS062  |                             |
| <b>Cerebral abscess</b>                                                                                                 |             |                         |                             |
| Intracranial abscess or granuloma, extradural or subdural abscess, intracranial abscess or granuloma with other disease |             | DG060, DG062, DG079     |                             |
| <b>Congenital malformations</b>                                                                                         |             |                         |                             |
| Chiari malformation or Dandy-Walker syndrome                                                                            |             | DQ070, DQ031            |                             |

Supplementary table 4. Definitions of the exclusion criteria used in the study, registers used and number of excluded patients.



|                                                                                                                                                                                                                                                                    |                                                                     |                                                                       |       |
|--------------------------------------------------------------------------------------------------------------------------------------------------------------------------------------------------------------------------------------------------------------------|---------------------------------------------------------------------|-----------------------------------------------------------------------|-------|
| Prior use of AED <sup>1</sup> or diagnosis of epilepsy                                                                                                                                                                                                             | The National Prescription Register<br>The National Patient Register | ATC <sup>2</sup> : N03A<br>ICD-10 <sup>3</sup> : DG40,<br>DG41, DR252 | 3,752 |
| Patients with no address in Denmark at the date of craniotomy                                                                                                                                                                                                      | The Civil Registration System                                       | -                                                                     | 15    |
| Patients, in which none of the above-mentioned indications for craniotomy could be assessed, e.g., lack of registered diagnosis within 30 days prior to the craniotomy for non-tumour indications, and before 90 days after the craniotomy for tumour indications. | The National Patient Register<br>The Danish Cancer Register         | Please, see supplementary table 2 and 3.                              | 3,359 |
| Patients with $\geq 2$ non-tumour indications.                                                                                                                                                                                                                     | The National Patient Register<br>The Danish Cancer Register         | Please, see supplementary table 2 and 3.                              | 367   |
| Patients with $\geq 2$ diagnoses within the indication group.                                                                                                                                                                                                      | The National Patient Register<br>The Danish Cancer Register         | Please, see supplementary table 2 and 3.                              | 89    |

1: Anti-epileptic drugs

2: Anatomic Therapeutical Codes

3: International Classification of Diseases

Supplementary table 5. The 6-months, 1-year and 5-years risks of postoperative de novo epilepsy and death after craniotomy in neurosurgical patients for all major neurosurgical diseases in Denmark, 2005-2016. Estimated state of occupancy probabilities of the four states: alive without epilepsy, alive with epilepsy, deceased without epilepsy and deceased with epilepsy.

| Disease                               | State                 | 6 months, %<br>(95% CI <sup>a</sup> ) | 1 year, %<br>(95% CI <sup>a</sup> ) | 5 years, %<br>(95% CI <sup>a</sup> ) |
|---------------------------------------|-----------------------|---------------------------------------|-------------------------------------|--------------------------------------|
| All patients<br>N = 8,948             | Alive wo. epilepsy    | 72.3 (71.3 to 73.2)                   | 62.2 (61.2 to 63.2)                 | 44.2 (43.1 to 45.3)                  |
|                                       | Alive w. epilepsy     | 8.4 (7.9 to 9.0)                      | 10.7 (10.1 to 11.4)                 | 10.6 (9.9 to 11.3)                   |
|                                       | Deceased wo. epilepsy | 18.0 (17.2 to 18.8)                   | 23.9 (23.1 to 24.8)                 | 35.4 (34.4 to 36.4)                  |
|                                       | Deceased w. epilepsy  | 1.3 (1.1 to 1.5)                      | 3.2 (2.8 to 3.6)                    | 9.8 (9.1 to 10.4)                    |
| All intracranial tumours<br>N = 4,710 | Alive wo. epilepsy    | 72.4 (71.1 to 73.6)                   | 58.4 (57.0 to 59.8)                 | 35.6 (34.2 to 37.0)                  |
|                                       | Alive w. epilepsy     | 9.2 (8.4 to 10.1)                     | 10.4 (9.6 to 11.3)                  | 6.9 (6.2 to 7.8)                     |
|                                       | Deceased wo. epilepsy | 16.6 (15.6 to 17.7)                   | 26.2 (25.0 to 27.5)                 | 42.6 (41.2 to 44.1)                  |
|                                       | Deceased w. epilepsy  | 1.8 (1.4 to 2.2)                      | 5.0 (4.4 to 5.6)                    | 14.9 (13.8 to 16.0)                  |
| Astrocytoma<br>N = 245                | Alive wo. epilepsy    | 81.6 (76.9 to 86.6)                   | 71.4 (66.0 to 77.3)                 | 48.6 (42.5 to 55.7)                  |
|                                       | Alive w. epilepsy     | 9.4 (6.4 to 13.9)                     | 13.9 (10.2-19.0)                    | 14.6 (10.4 to 20.5)                  |
|                                       | Deceased wo. epilepsy | 8.2 (5.4 to 12.4)                     | 12.2 (8.8 to 17.1)                  | 22.0 (17.3 to 28.0)                  |
|                                       | Deceased w. epilepsy  | 0.8 (0.2 to 3.2)                      | 2.4 (1.1 to 5.4)                    | 14.8 (10.7 to 20.4)                  |
| Cranial nerves<br>N = 316             | Alive wo. epilepsy    | 97.2 (95.3 to 99.0)                   | 96.8 (94.9 to 98.8)                 | 95.7 (93.4 to 98.0)                  |
|                                       | Alive w. epilepsy     | 0.6 (0.2 to 2.5)                      | 0.9 (0.3 to 2.9)                    | 1.4 (0.5 to 3.6)                     |
|                                       | Deceased wo. epilepsy | 1.9 (0.9 to 4.2)                      | 1.9 (0.9 to 4.2)                    | 2.6 (1.3 to 5.3)                     |
|                                       | Deceased w. epilepsy  | 0.3 (0.0 to 2.2)                      | 0.3 (0.0 to 2.2)                    | 0.3 (0.0 to 2.2)                     |
| Embryonal<br>N = 104                  | Alive wo. epilepsy    | 81.7 (74.6 to 89.5)                   | 76.9 (69.2 to 85.5)                 | 52.2 (43.0 to 63.4)                  |
|                                       | Alive w. epilepsy     | 4.8 (2.0 to 11.3)                     | 3.8 (1.5 to 10.1)                   | 4.0 (1.3 to 11.9)                    |
|                                       | Deceased wo. epilepsy | 10.6 (6.0 to 18.5)                    | 13.5 (8.3 to 21.9)                  | 29.7 (21.8 to 40.5)                  |
|                                       | Deceased w. epilepsy  | 2.9 (0.9 to 8.8)                      | 5.8 (2.7 to 12.5)                   | 14.1 (8.6 to 23.0)                   |
| Glioblastoma<br>N = 1,593             | Alive wo. epilepsy    | 60.9 (58.6 to 63.4)                   | 37.1 (34.8 to 39.6)                 | 2.1 (1.4 to 3.1)                     |
|                                       | Alive w. epilepsy     | 12.9 (11.3 to 14.6)                   | 13.1 (11.6 to 14.9)                 | 1.6 (1.0 to 2.4)                     |
|                                       | Deceased wo. epilepsy | 22.6 (20.6 to 24.8)                   | 39.3 (37.0 to 41.8)                 | 67.1 (64.8 to 69.5)                  |
|                                       | Deceased w. epilepsy  | 3.6 (2.8 to 4.6)                      | 10.4 (9.0 to 12.0)                  | 29.2 (27.0 to 31.6)                  |
| Meningioma<br>N = 1,245               | Alive wo. epilepsy    | 85.5 (83.6 to 87.5)                   | 82.2 (80.2 to 84.4)                 | 70.1 (67.5 to 72.9)                  |
|                                       | Alive w. epilepsy     | 9.4 (7.9 to 11.2)                     | 12.0 (10.3 to 13.9)                 | 16.6 (14.5 to 18.9)                  |
|                                       | Deceased wo. epilepsy | 5.1 (4.0 to 6.4)                      | 5.7 (4.6 to 7.1)                    | 10.8 (9.1 to 12.8)                   |

|                                                           |                       |                     |                     |                     |
|-----------------------------------------------------------|-----------------------|---------------------|---------------------|---------------------|
|                                                           | Deceased w. epilepsy  | 0 (NA)              | 0.1 (0.0 to 0.6)    | 2.5 (1.7 to 3.7)    |
| Mesenchymal<br>N = 105                                    | Alive wo. epilepsy    | 90.5 (85.0 to 96.3) | 88.6 (82.7 to 94.9) | 83.9 (76.8 to 91.5) |
|                                                           | Alive w. epilepsy     | 5.7 (2.6 to 12.4)   | 6.7 (3.3 to 13.6)   | 5.8 (2.7 to 12.7)   |
|                                                           | Deceased wo. epilepsy | 2.9 (0.9 to 8.7)    | 3.8 (1.5 to 10.0)   | 7.4 (3.6 to 15.4)   |
|                                                           | Deceased w. epilepsy  | 1.0 (0.1 to 6.7)    | 1.0 (0.1 to 6.7)    | 2.9 (0.9 to 8.8)    |
| Metastasis<br>N = 746                                     | Alive wo. epilepsy    | 53.4 (49.9 to 57.1) | 32.3 (29.1 to 35.8) | 5.8 (4.3 to 8.0)    |
|                                                           | Alive w. epilepsy     | 4.6 (3.3 to 6.3)    | 4.4 (3.2 to 6.2)    | 0.7 (0.1 to 3.2)    |
|                                                           | Deceased wo. epilepsy | 39.5 (36.2 to 43.2) | 57.8 (54.3 to 61.4) | 82.2 (79.4 to 85.0) |
|                                                           | Deceased w. epilepsy  | 2.5 (1.6 to 4.0)    | 5.5 (4.1 to 7.4)    | 11.3 (9.1 to 14.0)  |
| Oligodendroglioma<br>N = 193                              | Alive wo. epilepsy    | 74.1 (68.2 to 80.5) | 52.3 (45.7 to 59.9) | 14.6 (10.1 to 21.2) |
|                                                           | Alive w. epilepsy     | 16.6 (12.1 to 22.8) | 19.7 (14.8 to 26.2) | 15.3 (10.7 to 22.0) |
|                                                           | Deceased wo. epilepsy | 9.3 (6.0 to 14.5)   | 22.3 (17.1 to 29.0) | 41.8 (35.2 to 49.6) |
|                                                           | Deceased w. epilepsy  | 0 (NA)              | 5.7 (3.2 to 10.1)   | 28.3 (22.2 to 36.0) |
| All spontaneous intracranial<br>haemorrhages<br>N = 2,519 | Alive wo. epilepsy    | 74.5 (72.8 to 76.2) | 68.6 (66.8 to 70.5) | 57.0 (55.1 to 59.1) |
|                                                           | Alive w. epilepsy     | 6.5 (5.6 to 7.5)    | 10.5 (9.4 to 11.8)  | 15.1 (13.7 to 16.6) |
|                                                           | Deceased wo. epilepsy | 18.7 (17.2 to 20.2) | 20.1 (18.6 to 21.7) | 24.7 (23.0 to 26.4) |
|                                                           | Deceased w. epilepsy  | 0.4 (0.2 to 0.7)    | 0.8 (0.5 to 1.2)    | 3.2 (2.6 to 4.1)    |
| Ruptured aneurysm<br>N = 740                              | Alive wo. epilepsy    | 77.2 (74.2 to 80.2) | 71.9 (68.7 to 75.2) | 63.3 (59.8 to 67.0) |
|                                                           | Alive w. epilepsy     | 5.3 (3.9 to 7.2)    | 9.6 (7.7 to 12.0)   | 13.9 (11.5 to 16.7) |
|                                                           | Deceased wo. epilepsy | 17.6 (15.0 to 20.5) | 18.4 (15.8 to 21.4) | 21.4 (18.6 to 24.6) |
|                                                           | Deceased w. epilepsy  | 0 (NA)              | 0.1 (0.0 to 1.0)    | 1.5 (0.8 to 2.8)    |
| AVM or<br>Moya-Moya disease<br>N = 165                    | Alive wo. epilepsy    | 83.6 (78.2 to 89.5) | 82.4 (76.8 to 88.4) | 67.9 (60.8 to 75.7) |
|                                                           | Alive w. epilepsy     | 12.7 (8.5 to 19.0)  | 13.3 (9.0 to 19.7)  | 22.0 (16.4 to 29.6) |
|                                                           | Deceased wo. epilepsy | 3.6 (1.7 to 8.0)    | 3.6 (1.7 to 8.0)    | 7.3 (4.1 to 13.0)   |
|                                                           | Deceased w. epilepsy  | 0 (NA)              | 0.6 (0.1 to 4.3)    | 2.8 (1.1 to 7.6)    |
| Non-ruptured<br>aneurysm<br>N = 434                       | Alive wo. epilepsy    | 94.2 (92.1 to 96.5) | 91.9 (89.4 to 94.5) | 84.8 (81.4 to 88.4) |
|                                                           | Alive w. epilepsy     | 3.5 (2.1 to 5.7)    | 5.1 (3.4 to 7.6)    | 6.5 (4.4 to 9.4)    |
|                                                           | Deceased wo. epilepsy | 2.1 (1.1 to 4.0)    | 2.8 (1.6 to 4.8)    | 6.9 (4.8 to 9.9)    |
|                                                           | Deceased w. epilepsy  | 0.2 (0.0 to 1.6)    | 0.2 (0.0 to 1.6)    | 1.8 (0.9 to 3.8)    |
| Intracerebral<br>haemorrhage<br>N = 1,180                 | Alive wo. epilepsy    | 64.2 (61.5 to 67.0) | 56.1 (53.3 to 59.0) | 41.4 (38.5 to 44.4) |
|                                                           | Alive w. epilepsy     | 7.5 (6.1 to 9.1)    | 12.7 (11.0 to 14.8) | 18.0 (15.8 to 20.5) |
|                                                           | Deceased wo. epilepsy | 27.5 (25.1 to 30.2) | 29.8 (27.3 to 32.6) | 35.7 (33.0 to 38.6) |
|                                                           | Deceased w. epilepsy  | 0.8 (0.4 to 1.5)    | 1.4 (0.8 to 2.2)    | 4.9 (3.7 to 6.5)    |
| All traumatic intracranial<br>haemorrhages<br>N = 1,366   | Alive wo. epilepsy    |                     |                     |                     |
|                                                           | Alive w. epilepsy     | 66.2 (63.7 to 68.7) | 60.6 (58.1 to 63.2) | 46.3 (43.6 to 49.1) |
|                                                           |                       | 7.1 (5.9 to 8.6)    | 9.3 (7.9 to 11.0)   | 11.6 (9.9 to 13.6)  |

|                                         |                       |                      |                      |                     |
|-----------------------------------------|-----------------------|----------------------|----------------------|---------------------|
|                                         | Deceased wo. epilepsy | 25.4 (23.2 to 27.8)  | 28.3 (26.0 to 30.8)  | 36.7 (34.2 to 39.4) |
|                                         | Deceased w. epilepsy  | 1.3 (0.8 to 2.1)     | 1.8 (1.2 to 2.7)     | 5.4 (4.3 to 6.9)    |
| Cerebral contusion<br>N = 214           | Alive wo. epilepsy    | 61.7 (55.5 to 68.5)  | 55.1 (48.8 to 62.2)  | 40.3 (34.1 to 47.7) |
|                                         | Alive w. epilepsy     | 6.1 (3.6 to 10.3)    | 11.7 (8.1 to 17.0)   | 19.5 (14.6 to 26.0) |
|                                         | Deceased wo. epilepsy | 30.4 (24.8 to 37.2)  | 31.3 (25.7 to 38.2)  | 34.5 (28.7 to 41.6) |
|                                         | Deceased w. epilepsy  | 1.9 (0.7 to 4.9)     | 1.9 (0.7 to 4.9)     | 5.7 (3.2 to 10.0)   |
| Epidural haematoma<br>N = 277           | Alive wo. epilepsy    | 84.8 (80.7 to 89.2)  | 83.4 (79.1 to 87.9)  | 77.1 (72.2 to 82.3) |
|                                         | Alive w. epilepsy     | 6.1 (3.9 to 9.7)     | 7.2 (4.7 to 11.0)    | 9.5 (6.6 to 13.8)   |
|                                         | Deceased wo. epilepsy | 9.0 (6.2 to 13.1)    | 9.0 (6.2 to 13.1)    | 11.0 (7.9 to 15.5)  |
|                                         | Deceased w. epilepsy  | 0 (NA)               | 0.4 (0.1 to 2.6)     | 2.3 (1.1 to 5.2)    |
| Traumatic subdural haematoma<br>N = 875 | Alive wo. epilepsy    | 61.4 (58.2 to 64.7)  | 54.7 (51.5 to 58.1)  | 37.7 (34.5 to 41.3) |
|                                         | Alive w. epilepsy     | 7.7 (6.1 to 9.6)     | 9.4 (7.6 to 11.5)    | 10.2 (8.3 to 12.7)  |
|                                         | Deceased wo. epilepsy | 29.4 (26.5 to 32.5)  | 33.6 (30.6 to 36.9)  | 45.6 (42.3 to 49.2) |
|                                         | Deceased w. epilepsy  | 1.6 (1.0 to 2.7)     | 2.3 (1.5 to 3.5)     | 6.4 (4.9 to 8.5)    |
| Intracranial abscess<br>N = 275         | Alive wo. epilepsy    | 74.2 (69.2 to 79.5)  | 66.5 (61.2 to 72.4)  | 53.3 (47.4 to 59.9) |
|                                         | Alive w. epilepsy     | 20.4 (16.1 to 25.7)  | 25.8 (21.1 to 31.5)  | 29.7 (24.6 to 36.0) |
|                                         | Deceased wo. epilepsy | 4.4 (2.5 to 7.6)     | 5.8 (3.6 to 9.4)     | 10.9 (7.6 to 15.7)  |
|                                         | Deceased w. epilepsy  | 1.1 (0.4 to 3.4)     | 1.8 (0.8 to 4.3)     | 6.0 (3.6 to 10.1)   |
| Congenital malformations<br>N = 78      | Alive wo. epilepsy    | 96.2 (92.0 to 100.0) | 96.2 (92.0 to 100.0) | 89.8 (82.8 to 97.4) |
|                                         | Alive w. epilepsy     | 3.8 (1.3 to 11.7)    | 3.8 (1.3 to 11.7)    | 5.6 (2.1 to 14.7)   |
|                                         | Deceased wo. epilepsy | 0 (NA)               | 0 (NA)               | 4.6 (1.5 to 14.2)   |
|                                         | Deceased w. epilepsy  | 0 (NA)               | 0 (NA)               | 0 (NA)              |

a: CI: Confidence interval

b: No analyses done for the six small cancer groups (oligoastrocytoma, ependymal, pineal region, germ cell, sellar region and miscellaneous)

Supplementary table 6. The 6-months, 1-year and 5-years cumulative risks of postoperative de novo epilepsy and death after craniotomy in neurosurgical patients for all major neurosurgical diseases in Denmark, 2005-2016 measured by use of anti-epileptic drugs (AED).

| Disease                                   | Total no. of patients | Patients with AED treatment | CR <sup>a</sup> 6 months, % (95% CI <sup>b</sup> ) | CR <sup>a</sup> 1 year, % (95% CI <sup>b</sup> ) | CR <sup>a</sup> 5 years, % (95% CI <sup>b</sup> ) |
|-------------------------------------------|-----------------------|-----------------------------|----------------------------------------------------|--------------------------------------------------|---------------------------------------------------|
| All patients                              | 8,550                 | 2,412                       | 13.2 (12.5-13.9)                                   | 19.0 (18.2-19.9)                                 | 27.9 (27.0-28.9)                                  |
| All intracranial tumours                  | 4,515 <sup>c</sup>    | 1,388                       | 16.1 (15.0-17.2)                                   | 21.8 (20.6-23.0)                                 | 30.8 (29.5-32.3)                                  |
| Astrocytoma                               | 236                   | 80                          | 16.9 (12.8-22.5)                                   | 21.2 (16.6-27.1)                                 | 33.1 (27.5-40.0)                                  |
| Cranial nerves                            | 300                   | 29                          | 2.3 (1.1-4.9)                                      | 4.0 (2.3-7.0)                                    | 10.2 (7.1-14.7)                                   |
| Embryonal                                 | 101                   | 17                          | 2.0 (0.5-7.8)                                      | 4.0 (1.5-10.3)                                   | 15.4 (9.5-25.1)                                   |
| Glioblastoma                              | 1,539                 | 615                         | 22.3 (20.3-24.5)                                   | 31.2 (29.0-33.6)                                 | 40.8 (38.3-43.3)                                  |
| Meningioma                                | 1,187                 | 325                         | 13.4 (11.6-15.5)                                   | 17.2 (15.2-19.5)                                 | 26.5 (24.0-29.3)                                  |
| Mesenchymal                               | 103                   | 19                          | 7.8 (4.0-15.2)                                     | 9.8 (5.4-17.6)                                   | 15.4 (9.6-24.7)                                   |
| Metastasis                                | 713                   | 178                         | 14.7 (12.4-17.6)                                   | 19.8 (17.1-23.0)                                 | 25.2 (22.1-28.6)                                  |
| Oligodendroglioma                         | 179                   | 93                          | 26.8 (21.1-34.2)                                   | 36.9 (30.4-44.7)                                 | 54.5 (47.4-62.8)                                  |
| All spontaneous intracranial haemorrhages | 2,386                 | 598                         | 8.5 (7.5-9.7)                                      | 15.3 (13.9-16.8)                                 | 24.3 (22.5-26.1)                                  |
| Ruptured aneurysm                         | 711                   | 161                         | 7.0 (5.4-9.2)                                      | 13.0 (10.7-15.7)                                 | 21.4 (18.5-24.7)                                  |
| AVM or Moya Moya disease                  | 150                   | 41                          | 12.7 (8.3-19.3)                                    | 16.0 (11.1-23.1)                                 | 25.9 (19.6-34.3)                                  |
| Cerebral aneurysm, non-ruptured           | 390                   | 70                          | 5.9 (4.0-8.8)                                      | 9.0 (6.6-12.4)                                   | 17.9 (14.3-22.5)                                  |
| Intracerebral haemorrhage                 | 1,135                 | 326                         | 9.8 (8.2-11.7)                                     | 18.8 (16.6-21.2)                                 | 28.1 (25.5-30.9)                                  |
| All traumatic intracranial haemorrhages   | 1,311                 | 295                         | 9.5 (8.0-11.2)                                     | 13.9 (12.1-15.9)                                 | 21.7 (19.5-24.1)                                  |
| Cerebral contusion                        | 207                   | 63                          | 8.2 (5.2-13.0)                                     | 15.6 (11.3-21.4)                                 | 29.3 (23.5-36.4)                                  |
| Epidural haematoma                        | 271                   | 38                          | 4.1 (2.3-7.3)                                      | 6.3 (4.0-10.0)                                   | 13.8 (10.1-18.8)                                  |
| Traumatic subdural haematoma              | 833                   | 194                         | 11.5 (9.6-13.9)                                    | 15.9 (13.6-18.6)                                 | 22.4 (19.6-25.5)                                  |
| Intracranial abscess                      | 266                   | 117                         | 26.7 (21.9-32.6)                                   | 33.8 (28.6-40.0)                                 | 43.8 (38.0-50.4)                                  |
| Congenital malformations                  | 72                    | 14                          | 7.0 (3.0-16.2)                                     | 9.8 (4.9-19.8)                                   | 21.1 (12.8-34.8)                                  |

Abbreviation: aSAH: Aneurysmal subarachnoid haemorrhage, AVM: Arteriovenous malformation of cerebral vessels, ICH: Intracerebral haemorrhage

a: Cumulative risks are the summation of patients alive with epilepsy and deceased with epilepsy

b: CI: Confidence interval

c: No analyses done for the six small cancer groups (oligoastrocytoma, ependymal, pineal region, germ cell, sellar region and miscellaneous)

Supplementary table 7. The 6-months, 1-year and 5-years cumulative risks of postoperative de novo epilepsy in neurosurgical patients according to age of patient at the time of surgery.

| Age-groups | Total patients<br>N = 8,948 | Patients with epilepsy<br>N = 1,833 | CR <sup>a</sup> 6 months, %<br>(95% CI <sup>b</sup> ) | CR <sup>a</sup> 1 year, %<br>(95% CI <sup>b</sup> ) | CR <sup>a</sup> 5 years, %<br>(95% CI <sup>b</sup> ) |
|------------|-----------------------------|-------------------------------------|-------------------------------------------------------|-----------------------------------------------------|------------------------------------------------------|
| 0 – 9      | 255                         | 42                                  | 8.6 (5.8-12.9)                                        | 9.8 (6.8-14.2)                                      | 14.2 (10.4-19.3)                                     |
| 10 – 19    | 300                         | 49                                  | 7.7 (5.2-11.4)                                        | 10.0 (7.1-14.0)                                     | 14.8 (11.2-19.6)                                     |
| 20 – 44    | 1,384                       | 316                                 | 9.5 (8.1-11.2)                                        | 13.9 (12.2-15.8)                                    | 22.5 (20.3-24.9)                                     |
| 45 – 59    | 2,648                       | 639                                 | 10.6 (9.5-11.9)                                       | 16.0 (14.7-17.5)                                    | 24.3 (22.6-26.0)                                     |
| 60 – 69    | 2,417                       | 492                                 | 9.9 (8.8-11.2)                                        | 14.1 (12.8-15.6)                                    | 20.5 (18.9-22.2)                                     |
| 70+        | 1,944                       | 295                                 | 8.7 (7.6-10.1)                                        | 11.7 (10.3-13.2)                                    | 15.0 (13.5-16.7)                                     |

a: Cumulative risks are the summation of patients alive with epilepsy and deceased with epilepsy

b: CI: Confidence interval

Supplementary table 8. The 6-months, 1-year and 5-years cumulative risks of postoperative de novo epilepsy in patients excluded from the main analyses due to lack of diagnosis within the time limits.

| <b>Total no. of patients</b> | <b>Patients with epilepsy</b> | <b>CR<sup>a</sup> 6 months, %<br/>(95% CI<sup>b</sup>)</b> | <b>CR<sup>a</sup> 1 year, %<br/>(95% CI<sup>b</sup>)</b> | <b>CR<sup>a</sup> 5 years, %<br/>(95% CI<sup>b</sup>)</b> |
|------------------------------|-------------------------------|------------------------------------------------------------|----------------------------------------------------------|-----------------------------------------------------------|
| 3,359                        | 399                           | 5.7 (5.0-6.5)                                              | 7.7 (6.8-8.6)                                            | 11.9 (10.8-13.0)                                          |

a: Cumulative risks are the summation of patients alive with epilepsy and deceased with epilepsy

b: CI: Confidence interval

Supplementary table 9. The 6-months, 1-year and 5-years cumulative risks of postoperative de novo epilepsy in patients with  $\geq 2$  non-tumour indications.

|                                                | <b>Total no. of patients</b> | <b>Patients with epilepsy</b> | <b>CR<sup>a</sup> 6 months, %<br/>(95% CI<sup>b</sup>)</b> | <b>CR<sup>a</sup> 1 year, %<br/>(95% CI<sup>b</sup>)</b> | <b>CR<sup>a</sup> 5 years, %<br/>(95% CI<sup>b</sup>)</b> |
|------------------------------------------------|------------------------------|-------------------------------|------------------------------------------------------------|----------------------------------------------------------|-----------------------------------------------------------|
| Patients with $\geq 2$ non-tumour indications. | 367                          | 76                            | 12.5 (9.6-16.4)                                            | 15.3 (12.0-19.4)                                         | 21.3 (17.4-26.0)                                          |

a: Cumulative risks are the summation of patients alive with epilepsy and deceased with epilepsy

b: CI: Confidence interval

Supplementary table 10. The 6-months, 1-year and 5-years cumulative risks of postoperative de novo epilepsy among patients with more than two diagnoses within the indication group. .

|                                                              | <b>Total no. of patients</b> | <b>Patients with epilepsy</b> | <b>CR<sup>a</sup> 6 months, %<br/>(95% CI<sup>b</sup>)</b> | <b>CR<sup>a</sup> 1 year, %<br/>(95% CI<sup>b</sup>)</b> | <b>CR<sup>a</sup> 5 years, %<br/>(95% CI<sup>b</sup>)</b> |
|--------------------------------------------------------------|------------------------------|-------------------------------|------------------------------------------------------------|----------------------------------------------------------|-----------------------------------------------------------|
| Patients with $\geq 2$ diagnoses within the indication group | 89                           | 14                            | 3.4 (1.1-10.3)                                             | 6.7(3.1-14.6)                                            | 16.4(10.1-26.5)                                           |

a: Cumulative risks are the summation of patients alive with epilepsy and deceased with epilepsy

b: CI: Confidence interval

Supplementary figure 1. Representation of the multistate model with states i) alive without epilepsy, ii) alive with epilepsy, iii) deceased without epilepsy and iv) deceased with epilepsy.

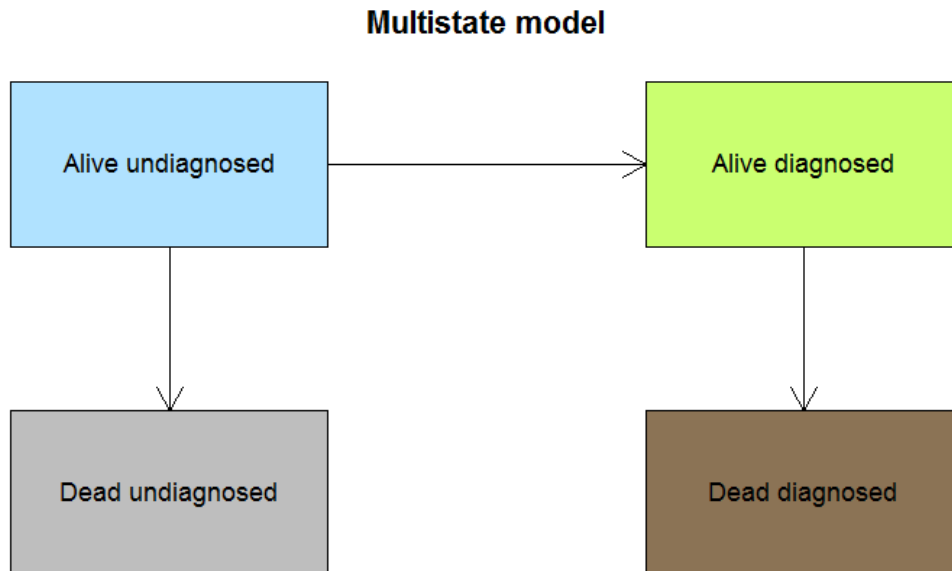

Supplement: jnnp-2021-326968supp001.pdf [file jnnp-2021-326968supp001.pdf]
